# Supplementary figures and images for: Accurate conformational stability and cationic structure of piperidine determined by conformer-specific VUV-MATI spectroscopy
Source: Royal Society of Chemistry journal article supplement (doi:10.1039/d0cp04407e), 2020-01-01

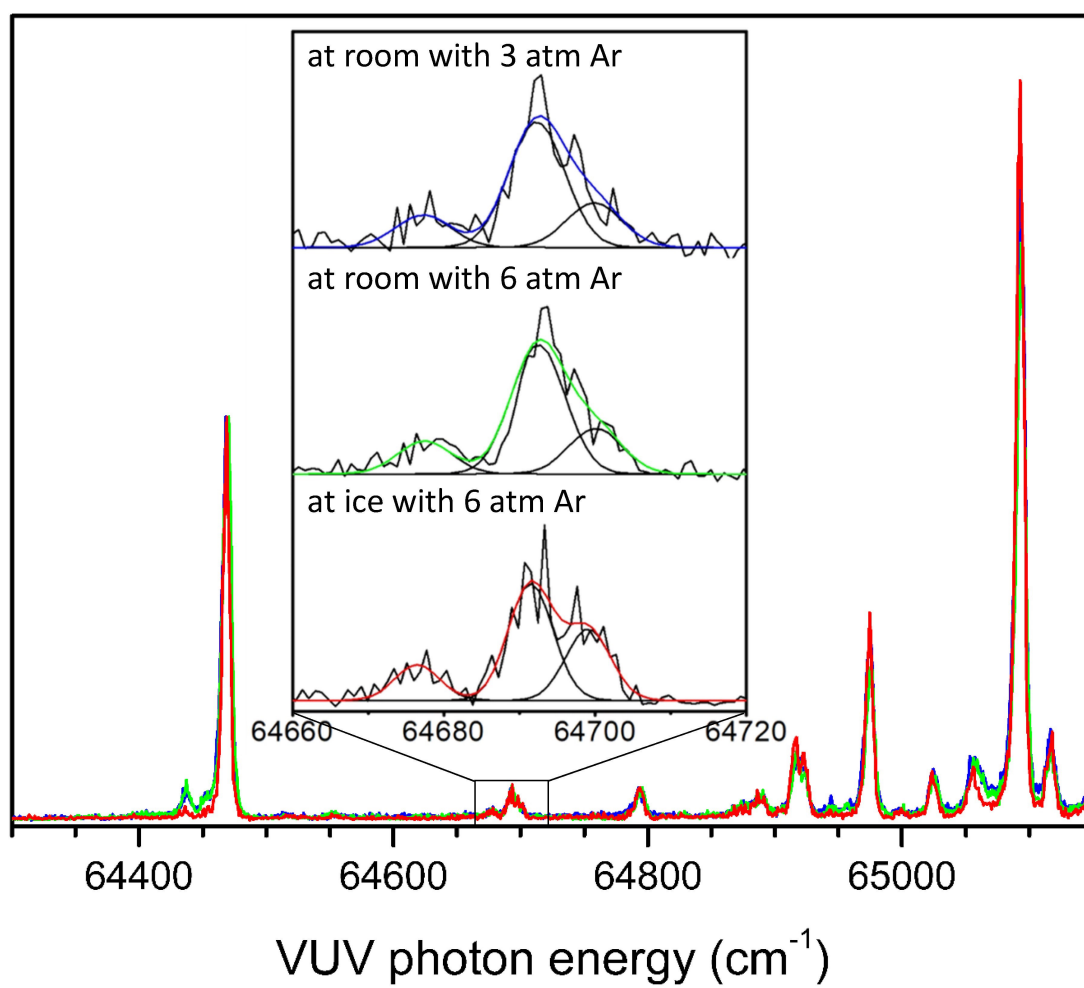

Supplement: d0cp04407e2.pdf [file d0cp04407e2.pdf]
